# Supplementary material for: Hippo signaling activates hedgehog signaling by Taz-driven Gli3 processing
Source: PubMed Central journal article supplement (PMC9889595; doi:10.1186/s13619-022-00151-6), 2023-02-01
Supplement: 13619_2022_151_MOESM1_ESM.pdf [file 13619_2022_151_MOESM1_ESM.pdf]

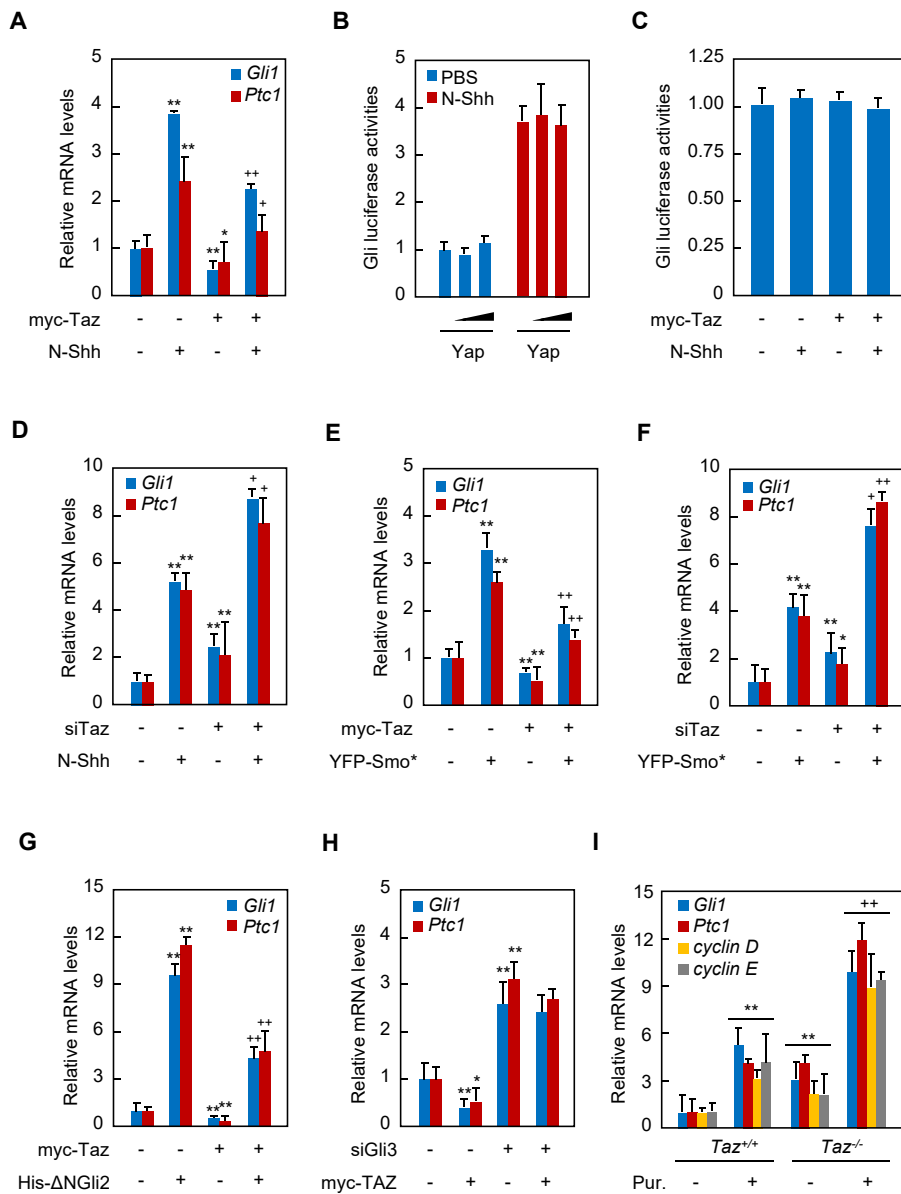

**Fig. S1. Taz negatively regulates Hh signaling in C3H10T1/2 cells.** **A** qRT-PCR analyses in C3H10T1/2 cells transfected with myc-Taz in combination with N-Shh and further cultured for 42 hrs. **B** Gli-luciferase analyses in C3H10T1/2 cells transfected with Yap expressing constructs and further cultured with or without N-Shh at 100 ng/ml for 42 hrs. **C** Gli-luciferase analyses in C3H10T1/2 cells transfected with a luciferase reporter containing 8x mutated Gli-binding sequences “GAAGTGGGA” and myc-Taz in combination with N-Shh and further cultured for 42 hrs. **D-F** qRT-PCR analyses in C3H10T1/2 cells transfected with myc-Taz or Taz siRNA in combination with N-Shh or YFP-Smo\* and further cultured for 42 hrs. **G** qRT-PCR analyses in *Gli2*-knockout C3H10T1/2 cells transfected with myc-Taz in combination with His-ΔGli2 and further cultured for 42 hrs. **H** qRT-PCR analyses in C3H10T1/2 cells transfected with myc-Taz in combination with Gli3 siRNA and further cultured for 42 hrs. **I** qRT-PCR analyses in *Taz*<sup>+/+</sup> or *Taz*<sup>-/-</sup> MEFs treated with Purmorphamine (Pur.) at 2 μM for 48 hrs. Error bars, SD; \*, + p < 0.05, \*\*, ++ p < 0.01, n=3.

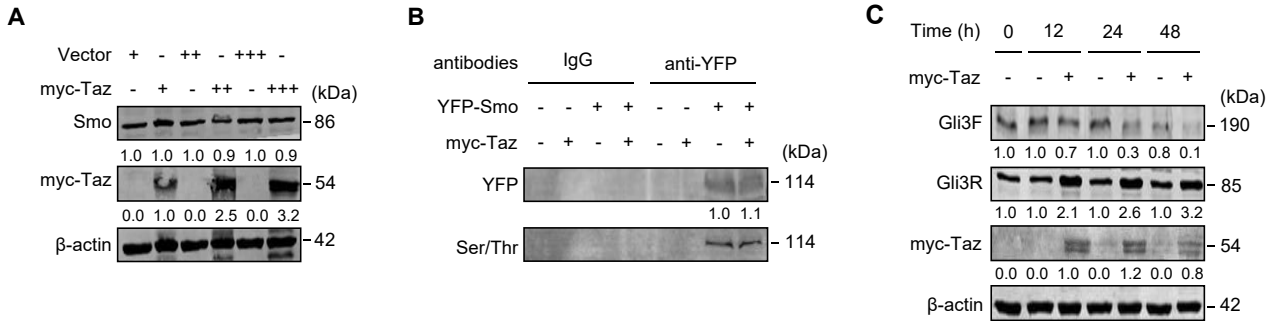

**Fig S2. Taz promotes the processing of Gli3F into Gli3R in C3H10T1/2 cells.** **A** Western analyses of Smo protein levels in C3H10T1/2 cells transfected with different dosages of myc-Taz and further cultured for 24 hrs. **B** Western analyses of p-Ser/Thr levels in YFP-Smo\* immunoprecipitated from C3H10T1/2 cells transfected with or without YFP-Smo\* and myc-Taz and further cultured for 24 hrs. **C** Western analyses in C3H10T1/2 cells transfected with or without myc-Taz and further cultured for the indicated times. Western analyses were either duplicated or triplicated and the mean value was illustrated under the bands.

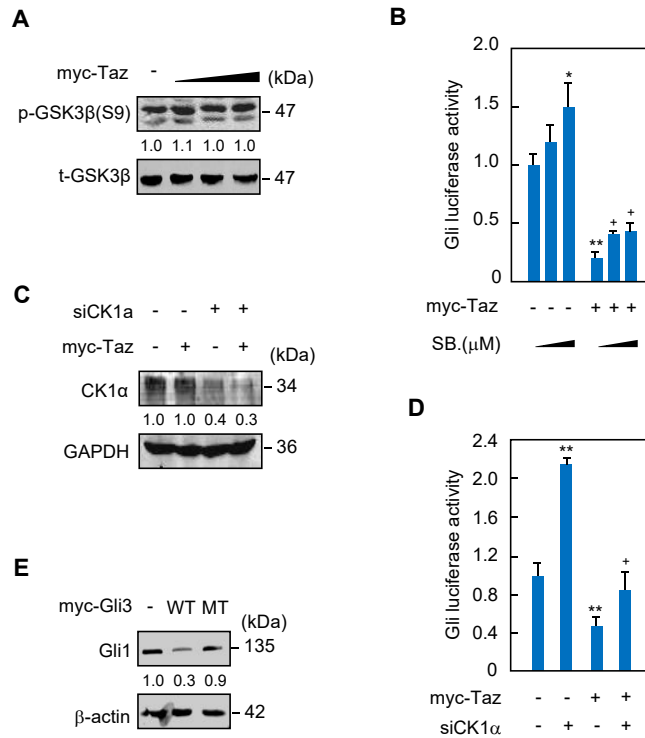

**Fig. S3. Taz drives the phosphorylation of Gli3 by PKA in C3H10T1/2 cells.** **A** Western analyses of p-GSK3β levels in C3H10T1/2 cells transfected with different dosages of myc-Taz and further cultured for 24 hrs. **B** Gli-luciferase analyses in C3H10T1/2 cells transfected with myc-Taz and followed by treatments with 0, 3 or 10 μM dosages of SB216763 (SB) for 12 hrs. **C** Western analyses of CK1α levels in C3H10T1/2 cells transfected with myc-Taz and CK1α siRNA. **D** Gli-luciferase analyses in C3H10T1/2 cells transfected with Taz and CK1α siRNA and further cultured for 42 hrs. **E** Western analyses of Gli1 in C3H10T1/2 cells expressing vector (-), myc-Gli3 (WT) or myc-Gli3 sextuple mutant (MT). Western analyses were either duplicated or triplicated and the mean value was illustrated under the bands. Error bars: SD; \*, +  $p < 0.05$ , \*\*, ++  $p < 0.01$ ,  $n = 3$ .

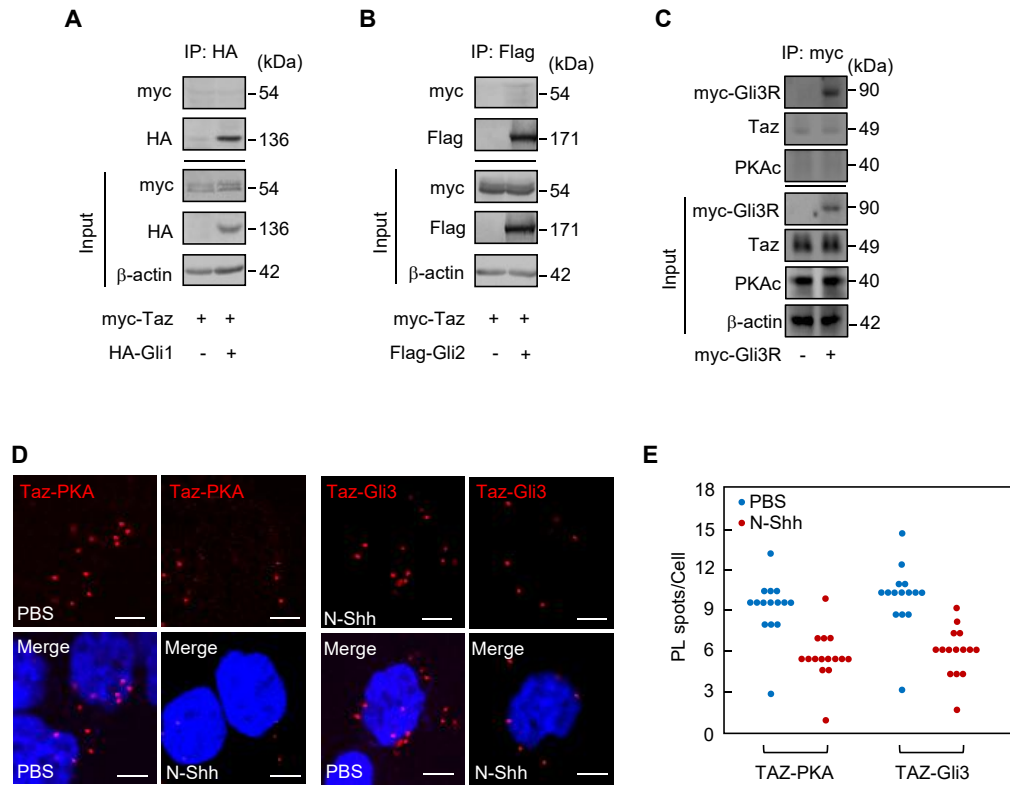

**Fig. S4. Taz facilitates the binding of Gli3 to PKA.** **A, B** Co-immunoprecipitation and western analyses in HEK293 cells expressing vector, myc-Taz, HA-Gli1 or Flag-Gli2 by using HA or Flag antibody. **C** Co-immunoprecipitation and western analyses in HEK293 cells expressing vector or myc-Gli3R by using myc antibody. **D** Proximity ligation assays (PLA) in primary limb bud cells by using Gli3, Taz or PKAc antibody. Scale bars, 35  $\mu$ m. **E** Quantitative analyses of the PL spots in (c); n=15. \*\*  $p < 0.01$ .

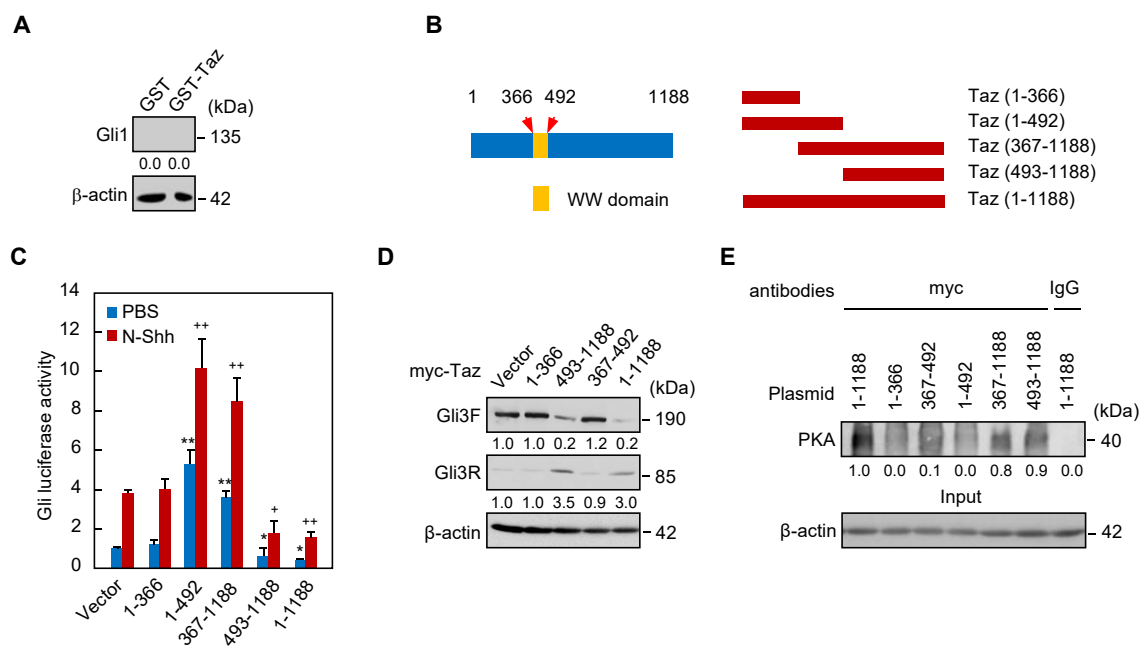

**Fig. S5. Taz facilitates the binding of Gli3 to PKA.** **A** Purified recombinant GST-TAZ from *E. coli* was incubated with Gli1 protein and western analyses was performed. **B** Schematic representation of deletion mutants of Taz domains. **C** Gli-luciferase analyses in C3H10T1/2 cells transfected with deletion mutants of Taz domains and further cultured with or without N-Shh at 100 ng/ml for 42 hrs. **D** Western analyses in C3H10T1/2 cells transfected with myc-tagged deletion mutants of Taz domain and followed by culture for 24 hrs. **E** Co-immunoprecipitation and western analyses in C3H10T1/2 cells transfected with myc-tagged deletion mutants of Taz domain by using myc antibody. Western analyses were either duplicated or triplicated and the mean value was illustrated under the bands. Error bars, SD; \*, +  $p < 0.05$ , \*\*, ++  $p < 0.01$ ,  $n = 3$ .

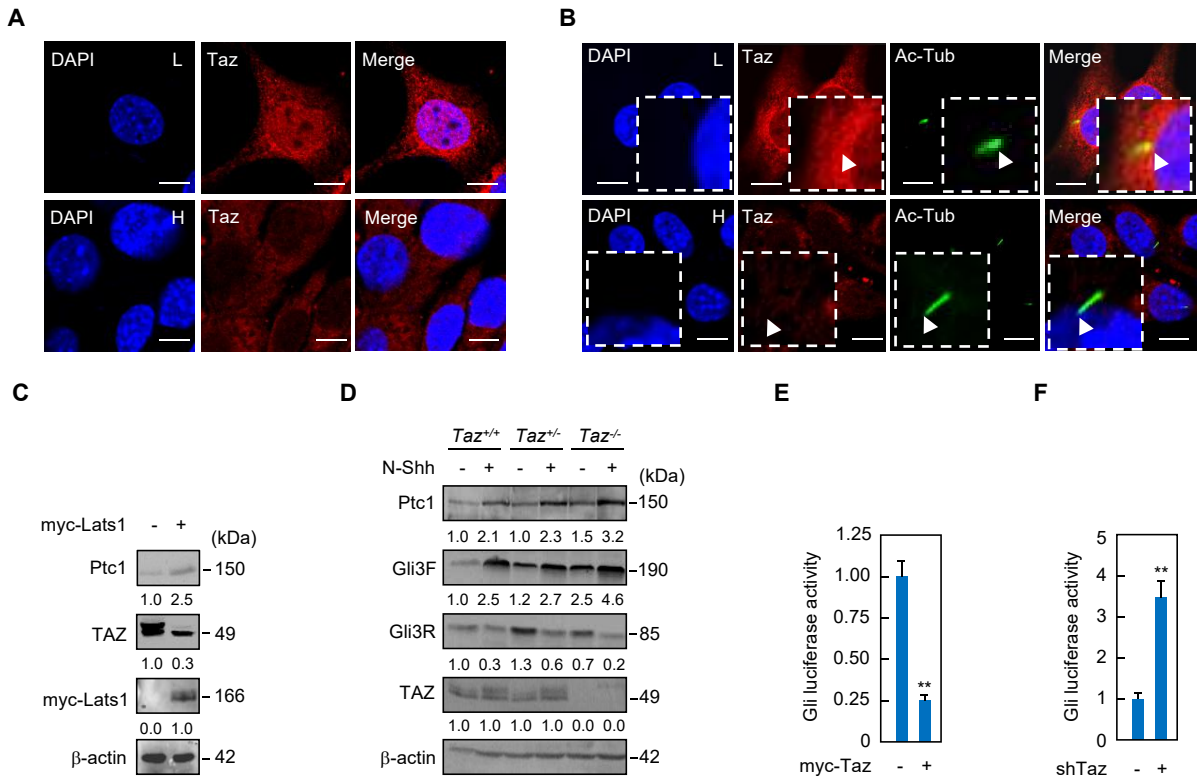

**Fig. S6. Activation of Hippo signaling negates Hh signaling.** **A** Immunofluorescence staining of C3H10T1/2 cells cultured at low cell density (L) or high cell density (H). Nuclei were counterstained by DAPI (blue) and Taz signal is in red. Scale bars, 25  $\mu$ m. **B** Immunofluorescence staining of C3H10T1/2 cells cultured at low cell density (L) or high cell density (H). Nuclei were counterstained by DAPI (blue), Taz signal is in red and acetyl-tubulin signal is in green. Arrowheads indicate the basalbodies of primary cilia. Scale bars, 15  $\mu$ m. **C** Western analyses in C3H10T1/2 cells expressing myc-Lats1 or vectors. **D** Western analyses in *Taz*<sup>+/+</sup>, *Taz*<sup>+/-</sup> or *Taz*<sup>-/-</sup> primary limb bud cultured with or without N-Shh at 100 ng/ml for 42 hrs. **E, F** Gli-luciferase analyses in NIH3T3 cells transfected with myc-Taz or Taz shRNA and further cultured for 42 hrs. Western analyses were either duplicated or triplicated and the mean value was illustrated under the bands. Error bars, SD; \*\*  $p < 0.01$ ,  $n = 3$ .

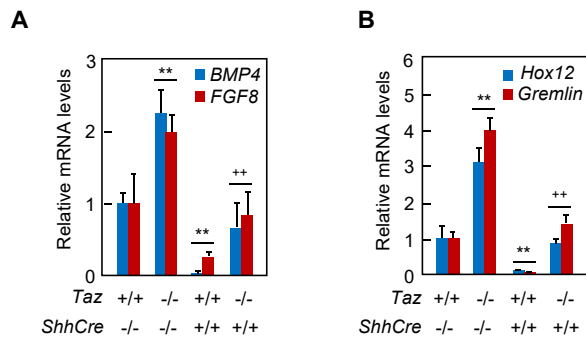

**Fig. S7. Taz interacts genetically with Shh in the embryonic limb patterning.** **A, B** qRT-PCR analyses of *BMP4*, *FGF8*, *Hox12*, and *Gremlin* in pooled limb buds with the indicated genotypes at E10.5. The representative results from three independent experiments were shown. Error bars, SD; \*  $p < 0.05$ , \*\*  $p < 0.01$ , ++  $p < 0.001$ ,  $n = 3$ .
